# Supplementary material
Source: publisher figshare collection journal article supplement (https://tandf.figshare.com/articles/dataset/_/7937435)
Supplement: Supplementary file 2 [file 1]

**Supplementary table 1** Blast analysis of genome sequences of these isolated viruses.

| <b>Genes</b> | <b>Virus Strains</b>                             | <b>Identity (%)</b> |
|--------------|--------------------------------------------------|---------------------|
| PB2          | A/Quail/Guangxi/GX-2/2017 (H5N6)                 | 98.50%              |
| PB1          | A/Environment/Guangxi/42586/2015 (H5N6)          | 98.59%              |
| PA           | A/Ostrich/Guangxi/GX-1/2017 (H5N6)               | 98.84%              |
| HA           | A/duck/Guangdong/01.01 SZSGXJK005-G /2016 (H5N6) | 98.30%              |
| NP           | A/duck/Guangdong/01.01 SZSGXJK005-G /2016 (H5N6) | 99.00%              |
| NA           | A/duck/Guangdong/01.01 SZSGXJK007-G/2016 (H5N6)  | 98.41%              |
| M            | A/duck/Guangdong/03.27 DGQTSJ133-O/2015 (Mixed)  | 99.00%              |
| NS           | A/duck/Guangdong/01.01 SZSGXJK006-G/2016 (H5N6)  | 98.40%              |

**Supplementary table 2** The reference ancestor strains and the estimate divergence time of each gene segment from its tMRCA.

| Genes | Reference ancestor strains                      | Estimated divergence time | 95% HPD  |          |
|-------|-------------------------------------------------|---------------------------|----------|----------|
|       |                                                 |                           | Upper    | Lower    |
| PB2   | A/duck/Hunan/04.22 LDDX037-P/2015 (H5N6)        | Jun 2014                  | Feb 2014 | Sep 2014 |
|       | A/duck/Guangdong/04.23 DGQTXC229-O/2015 (H5N6)  |                           |          |          |
| PB1   | A/Environment/Guangxi/44389/2015 (H5N6)         | May 2014                  | Apr 2013 | Dec 2014 |
|       | A/chicken/Japan/AQ-HE144/2015 (H5N6)            |                           |          |          |
| PA    | A/Goose/Qingyuan/16875/2016 (H5N6)              | Aug 2015                  | May 2015 | Nov 2015 |
| HA    | A/great egret/Hong Kong/00032/2016 (H5N6)       | Sep 2015                  | May 2015 | Dec 2015 |
| NP    | A/Goose/Qingyuan/16875/2016 (H5N6)              | Sep 2015                  | May 2015 | Oct 2015 |
| NA    | A/great egret/Hong Kong/00032/2016 (H5N6)       | Sep 2015                  | Jul 2015 | Dec 2015 |
| M     | A/duck/Guangdong/01.01 SZSGXJK006-G/2016 (H5N6) | Dec 2015                  | Sep 2015 | Feb 2016 |
| NS    | A/Muscovy duck/Vietnam/HU7-17/2017 (H5N6)       | Jun 2016                  | Aug 2015 | Dec 2016 |

**Supplementary table 3** Estimated evolutionary rates of each gene segments of H5N6 viruses by Bayesian analysis.

| Genes | Substitution rate and 95% HPD ( $10^{-3}$ substitution/site/year) |       |       |
|-------|-------------------------------------------------------------------|-------|-------|
|       | Mean                                                              | Lower | Upper |
| PA    | 3.55                                                              | 2.51  | 4.73  |
| PB1   | 3.08                                                              | 2.39  | 3.68  |
| PB2   | 2.65                                                              | 2.05  | 3.24  |
| HA    | 4.24                                                              | 3.14  | 5.32  |
| NP    | 2.50                                                              | 1.81  | 3.19  |
| NA    | 4.40                                                              | 3.47  | 5.25  |
| M     | 2.09                                                              | 1.41  | 2.71  |
| NS    | 3.66                                                              | 2.76  | 4.52  |

**Supplementary table 4** Molecular characteristics of isolated virus were analyzed using Influenza Research Database (IRD, <https://www.fludb.org/>)

| Viruses <sup>a</sup>     | H5 clade | HA <sup>b</sup> |                  |     | NA             | NS1           | M2                            |    |    |    |    | PB2                    |     |     |     | PB1         |     |                   | PA          |     |
|--------------------------|----------|-----------------|------------------|-----|----------------|---------------|-------------------------------|----|----|----|----|------------------------|-----|-----|-----|-------------|-----|-------------------|-------------|-----|
|                          |          | Cleavage site   | RBS <sup>c</sup> |     | Stalk deletion | 5-aa deletion | Drug-resistance associated aa |    |    |    |    | Air-borne transmission |     |     |     | aa residues |     | PB1-F2 truncation | aa residues |     |
|                          |          |                 | 222              | 224 | 58 - 68        | 80 - 84       | 26                            | 27 | 30 | 31 | 34 | 271                    | 591 | 627 | 701 | 99          | 368 |                   | 409         | 672 |
| JS01                     | 2.3.4.4  | RERRRKRR        | Q                | G   | Yes            | Yes           | L                             | V  | A  | S  | G  | T                      | Q   | E   | D   | H           | I   | 1-39              | S           | L   |
| JS02                     | 2.3.4.4  | RERRRKRR        | Q                | G   | Yes            | Yes           | L                             | V  | A  | S  | G  | T                      | Q   | E   | D   | H           | I   | 1-39              | S           | L   |
| K10                      | 2.3.4.4  | RERRRKRR        | Q                | G   | Yes            | Yes           | L                             | V  | A  | S  | G  | T                      | Q   | E   | D   | H           | I   | 1-39              | S           | L   |
| CNIC-21099 <sup>d</sup>  | 2.3.4.4  | REKRRKR         | Q                | G   | Yes            | No            | L                             | V  | A  | S  | G  | T                      | Q   | E   | D   | H           | I   | 12-90             | S           | L   |
| IDCDC-RG43A <sup>d</sup> | 2.3.4.4  | RERRRKRR        | Q                | G   | -              | No            | L                             | V  | A  | N  | G  | T                      | Q   | E   | D   | H           | I   | 1-39              | S           | F   |

<sup>a</sup> Abbreviations: CNIC-21099 represents A/Fujian-Sanyuan/21099/2017 (H5N6), IDCDC-RG43A represents A/gyrfalcon/Washington/41088-6/2014 (H5N8).

<sup>b</sup> H5 numbering

<sup>c</sup> RBS: Receptor binding site

<sup>d</sup> Reference viruses were selected based on candidate vaccine viruses recommended by CDC or CCDC

**Supplementary table 5** Dataset size, nucleotide length, best-fit model, and MCMC chain length for each gene segment.

| Datasets | Sequence numbers | Nucleotide length (nt) | Substitution models <sup>a</sup> | Relax-clock models <sup>b</sup> | Tree models        | MCMC chain length <sup>c</sup> |
|----------|------------------|------------------------|----------------------------------|---------------------------------|--------------------|--------------------------------|
| PB2      | 180              | 2280                   | GTR+G+I                          | UCED                            | Bayesian SkyGrid   | 200                            |
| PB1      | 193              | 2274                   | GTR+G+I                          | UCED                            | Bayesian SkyGrid   | 200                            |
| PA       | 192              | 2151                   | GTR+G+I                          | UCED                            | Bayesian SkyGrid   | 200                            |
| HA       | 183              | 1710                   | GTR+G                            | UCED                            | Bayesian SkyGrid   | 200                            |
| NP       | 164              | 1496                   | GTR+G                            | UCED                            | Exponential Growth | 200                            |
| NA       | 183              | 1446                   | GTR+G+I                          | UCED                            | Bayesian SkyGrid   | 200                            |
| M        | 178              | 981                    | GTR+G+I                          | UCED                            | Bayesian SkyGrid   | 100                            |
| NS       | 174              | 837                    | GTR+G+I                          | UCED                            | Bayesian SkyGrid   | 100                            |

<sup>a</sup> The nucleotide substitution models were determined by jModeltest2.

<sup>b</sup> UCED represents uncorrelated exponential clock model;

<sup>c</sup> The unit was million.
